# Supplementary material for: Roles of putative Rho-GEF Gef2 in division-site positioning and contractile-ring function in fission yeast cytokinesis
Source: PubMed Central journal article supplement — Mol Biol Cell. 2012 Apr 1;23(7):1181–95. doi: 10.1091/mbc.E11-09-0800 (PMC3315812; doi:10.1091/mbc.e11-09-0800), 2012-04-01
Supplement: supp_E11-09-0800v1_CombinedSupMats.pdf [file supp_E11-09-0800v1_CombinedSupMats.pdf]

**SUPPLEMENTAL MATERIALS**

**Supplemental Table S1.** *S. pombe* strains used in this study

| Strain | Genotype                                                                                                                            | Source/reference         |
|--------|-------------------------------------------------------------------------------------------------------------------------------------|--------------------------|
| JW703  | <i>h<sup>-</sup> myp2-Δ2::kanMX6 ade6-M210 leu1-32 ura4-D18</i>                                                                     | Lab stock                |
| JW729  | <i>h<sup>+</sup> ade6-M210 leu1-32 ura4-D18</i>                                                                                     | Lab stock                |
| JW739  | <i>h<sup>-</sup> ade6-M216 leu1-32 ura4-D18</i>                                                                                     | Lab stock                |
| JW1825 | <i>h<sup>+</sup> blt1Δ::kanMX4 ade6 leu1-32 ura4-D18</i>                                                                            | Kim <i>et al.</i> , 2010 |
| JW1826 | <i>h<sup>+</sup> gef2Δ::kanMX4 ade6 leu1-32 ura4-D18</i>                                                                            | Kim <i>et al.</i> , 2010 |
| JW2255 | <i>h<sup>+</sup> mid1-366 ade6-M210 leu1-32 ura4-D18</i>                                                                            | This study               |
| JW2556 | <i>h<sup>-</sup> ade6-M210 leu1-32</i>                                                                                              | This study               |
| JW2603 | <i>h<sup>-</sup> mid1(1-580)-6His-mECitrine-kanMX6 ade6-M210 leu1-32 ura4-D18</i>                                                   | This study               |
| JW2858 | <i>gef2Δ::kanMX4 myp2-Δ2::kanMX6 ade6 leu1-32 ura4-D18</i>                                                                          | This study               |
| JW2923 | <i>myo2-Δ2::kanMX6 rlc1-tdTomato-natMX6 leu1<sup>+</sup>::GFP-psy1 ade6 ura4</i>                                                    | This study               |
| JW2948 | <i>h<sup>+</sup> gef2Δ::hphMX6 myp2-Δ2::kanMX6 rlc1-tdTomato-natMX6 leu1<sup>+</sup>::GFP-psy1 ade6 ura4</i>                        | This study               |
| JW2972 | <i>cdc11-136 gef2Δ::hphMX6 ade6 leu1-32 ura4-D18</i>                                                                                | This study               |
| JW2997 | <i>h<sup>+</sup> gef2-mECitrine-natMX6 ade6 leu1-32 ura4-D18</i>                                                                    | This study               |
| JW3009 | <i>gef2Δ::hphMX6 sid2-250 ade6 leu1-32 ura4-D18</i>                                                                                 | This study               |
| JW3066 | <i>plo1.ts18::ura4<sup>+</sup> kan<sup>s</sup>-mYFP-myo2 sad1-CFP-kanMX6 ade6 leu1-32 ura4</i>                                      | This study               |
| JW3067 | <i>plo1.ts18::ura4<sup>+</sup> gef2Δ::hphMX6 kan<sup>s</sup>-mYFP-myo2 sad1-CFP-kanMX6 ade6 leu1-32 ura4</i>                        | This study               |
| JW3076 | <i>plo1.ts18::ura4<sup>+</sup> kan<sup>s</sup>-mYFP-4Gly-cdc15 Patb2-CFP-atb2 ade6 leu1-32 ura4-D18</i>                             | This study               |
| JW3077 | <i>h<sup>-</sup> gef2Δ::hphMX6 plo1.ts18::ura4<sup>+</sup> kan<sup>s</sup>-mYFP-4Gly-cdc15 Patb2-CFP-atb2 ade6 leu1-32 ura4-D18</i> | This study               |
| JW3078 | <i>h<sup>-</sup> gef2Δ::hphMX6 plo1.ts18::ura4<sup>+</sup> ade6 leu1-32 ura4-D18</i>                                                | This study               |
| JW3079 | <i>h<sup>-</sup> plo1.ts18::ura4<sup>+</sup> ade6 leu1-32 ura4-D18</i>                                                              | This study               |
| JW3184 | <i>h<sup>-</sup> gef2Δ::hphMX6 ade6 leu1-32</i>                                                                                     | This study               |
| JW3185 | <i>gef2Δ::hphMX6 kan<sup>s</sup>-mYFP-4Gly-cdc15 Patb2-CFP-atb2 ade6 leu1-32</i>                                                    | This study               |
| JW3186 | <i>kan<sup>s</sup>-mYFP-4Gly-cdc15 Patb2-CFP-atb2 ade6 leu1-32</i>                                                                  | This study               |
| JW3204 | <i>h<sup>-</sup> gef2-13Myc-hphMX6 ade6-M210 leu1-32 ura4-D18</i>                                                                   | This study               |
| JW3206 | <i>h<sup>-</sup> mid1-13Myc-hphMX6 ade6-M210 leu1-32 ura4-D18</i>                                                                   | This study               |
| JW3229 | <i>gef2Δ::hphMX6 plo1.ts18::ura4<sup>+</sup> 41nmt1-GFP-CHD (rng2)-leu1<sup>+</sup> rlc1-tdTomato-natMX6 ade6 leu1-32 ura4-D18</i>  | This study               |
| JW3230 | <i>plo1.ts18::ura4<sup>+</sup> 41nmt1-GFP-CHD (rng2)-leu1<sup>+</sup> rlc1-tdTomato-natMX6 ade6 leu1-32 ura4-D18</i>                | This study               |
| JW3237 | <i>gef2Δ::hphMX6 plo1.ts18::ura4<sup>+</sup> kanMX6-Purg1-mYFP-mid1 ade6 leu1-32 ura4-D18</i>                                       | This study               |
| JW3242 | <i>gef2Δ::hphMX6 plo1.ts18::ura4<sup>+</sup> ade6 leu1-32 ura4-D18 + pAP146 Pmid1-mid1-GFP integrated at leu1<sup>+</sup></i>       | This study               |
| JW3254 | <i>h<sup>+</sup> mid1-13Myc-kanMX6 ade6-M210 leu1-32 ura4-D18</i>                                                                   | This study               |
| JW3255 | <i>mid1-13Myc-kanMX6 gef2-mECitrine-natMX6 ade6 leu1-32 ura4-D18</i>                                                                | This study               |

|        |                                                                                                                                                                    |                              |
|--------|--------------------------------------------------------------------------------------------------------------------------------------------------------------------|------------------------------|
| JW3276 | <i>mid1-13Myc-kanMX6 ade6 leu1-32</i>                                                                                                                              | This study                   |
| JW3277 | <i>gef2Δ::hphMX6 mid1-13Myc-kanMX6 ade6 leu1-32</i>                                                                                                                | This study                   |
| JW3281 | <i>gef2Δ::hphMX6 plo1.ts18::ura4<sup>+</sup> mid1-mECitrine-kanMX6 Patb2-CFP-atb2 ade6 leu1-32 ura4-D18</i>                                                        | This study                   |
| JW3323 | <i>mid1-mECitrine-kanMX6 ade6 leu1-32</i>                                                                                                                          | Laporte <i>et al.</i> , 2011 |
| JW3324 | <i>gef2Δ::hphMX6 mid1-mECitrine-kanMX6 ade6 leu1-32</i>                                                                                                            | This study                   |
| JW3333 | <i>cdr2Δ::kanMX6 gef2-mECitrine-natMX6 mid1-13Myc-hphMX6 ade6 leu1-32 ura4-D18</i>                                                                                 | This study                   |
| JW3364 | <i>h<sup>+</sup> kanMX6-P81nmt1-mECitrine-mid1 ade6-210 leu1-32 ura4-D18</i>                                                                                       | This study                   |
| JW3383 | <i>plo1.ts18::ura4<sup>+</sup> gef2Δ::hphMX6 mid1-mECitrine-kanMX6 Patb2-CFP-atb2 ade6 leu1-32 ura4-D18 + pAP146 Pmid1-mid1-GFP integrated at leu1<sup>+</sup></i> | This study                   |
| JW3426 | <i>gef2Δ::hphMX6 plo1.ts18::ura4<sup>+</sup> mid1-cdr2-mEGFP-kanMX6 ade6 leu1-32 ura4-D18</i>                                                                      | This study                   |
| JW3497 | <i>h<sup>+</sup> gef2(Δ211-1101)-mECitrine-kanMX6 ade6-M216 leu1-32 ura4-D18</i>                                                                                   | This study                   |
| JW3498 | <i>h<sup>+</sup> gef2(Δ211-443)-mECitrine-natMX6 ade6-M216 leu1-32 ura4-D18</i>                                                                                    | This study                   |
| JW3546 | <i>gef2Δ::hphMX6 kan<sup>s</sup>-mYFP-myo2 sad1-CFP-kanMX6 ade6 leu1-32</i>                                                                                        | This study                   |
| JW3547 | <i>kan<sup>s</sup>-mYFP-myo2 sad1-CFP-kanMX6 ade6 leu1-32</i>                                                                                                      | Lab stock                    |
| JW3550 | <i>gef2Δ::hphMX6 plo1-24C ade6 leu1-32 ura4-D18</i>                                                                                                                | This study                   |
| JW3551 | <i>gef2Δ::hphMX6 plo1-1 ade6 leu1-32 ura4-D18</i>                                                                                                                  | This study                   |
| JW3552 | <i>gef2Δ::hphMX6 plo1-25 ade6 leu1-32 ura4-D18</i>                                                                                                                 | This study                   |
| JW3553 | <i>gef2Δ::hphMX6 plo1.ts4::ura4<sup>+</sup> ade6 leu1-32 ura4-D18</i>                                                                                              | This study                   |
| JW3554 | <i>41nmt1-GFP-CHD (rng2)-leu1<sup>+</sup> rlc1-tdTomato-natMX6 ade6 leu1-32</i>                                                                                    | This study                   |
| JW3555 | <i>gef2Δ::hphMX6 41nmt1-GFP-CHD (rng2)-leu1<sup>+</sup> rlc1-tdTomato-natMX6 ade6 leu1-32</i>                                                                      | This study                   |
| JW3558 | <i>gef2Δ::hphMX6 plo1.ts18::ura4<sup>+</sup> mid1-mECitrine-kanMX6 ade6 leu1-32 ura4-D18</i>                                                                       | This study                   |
| JW3559 | <i>plo1.ts18::ura4<sup>+</sup> mid1-mECitrine-kanMX6 ade6 leu1-32 ura4-D18 his2</i>                                                                                | This study                   |
| JW3560 | <i>gef2Δ::hphMX6 plo1.ts18::ura4<sup>+</sup> mid1-mEGFP-kanMX6 ade6 leu1-32 ura4-D18</i>                                                                           | This study                   |
| JW3567 | <i>mid1Δ::ura4<sup>+</sup> gef2Δ::kanMX4 ade6 leu1-32 ura4-D18 + pAP159 Pmid1 Helix* mid1-GFP integrated at leu1<sup>+</sup></i>                                   | This study                   |
| JW3568 | <i>mid1Δ::ura4<sup>+</sup> gef2Δ::kanMX4 ade6 leu1-32 ura4-D18 + pAP167 Pmid1 NLS* mid1-GFP integrated at leu1<sup>+</sup></i>                                     | This study                   |
| JW3569 | <i>mid1Δ::ura4<sup>+</sup> gef2Δ::kanMX4 ade6 leu1-32 ura4-D18 + pAP144 Pmid1 Cter-GFP integrated at leu1<sup>+</sup></i>                                          | This study                   |
| JW3570 | <i>mid1Δ::ura4<sup>+</sup> gef2Δ::kanMX4 ade6 leu1-32 ura4-D18 + pSM26 Pmid1 GFP-Nter integrated at leu1<sup>+</sup></i>                                           | This study                   |
| JW3573 | <i>rlc1-tdTomato-natMX6 leu1<sup>+</sup>::GFP-psy1 ade6 ura4</i>                                                                                                   | This study                   |
| JW3574 | <i>gef2Δ::hphMX6 rlc1-tdTomato-natMX6 leu1<sup>+</sup>::GFP-psy1 ade6</i>                                                                                          | This study                   |

|        |                                                                                                                                                                                                    |            |
|--------|----------------------------------------------------------------------------------------------------------------------------------------------------------------------------------------------------|------------|
| JW3575 | <i>ura4</i><br><i>gef2Δ::hphMX6 cdr2Δ::kanMX6 mid1-mECitrine-kanMX6 ade6 leu1-32 ura4-D18</i>                                                                                                      | This study |
| JW3576 | <i>gef2Δ::hphMX6 plo1.ts18::ura4<sup>+</sup> cdr2Δ::kanMX6 mid1-mECitrine-kanMX6 ade6 leu1-32 ura4-D18</i>                                                                                         | This study |
| JW3577 | <i>plo1.ts18::ura4<sup>+</sup> cdr2Δ::kanMX6 mid1-mECitrine-kanMX6 ade6 leu1-32 ura4-D18</i>                                                                                                       | This study |
| JW3578 | <i>cdr2Δ::kanMX6 mid1-mECitrine-kanMX6 ade6 leu1-32 ura4-D18</i>                                                                                                                                   | This study |
| JW3623 | <i>mid1Δ::ura4<sup>+</sup> gef2-13Myc-hphMX6 ade6 leu1-32 ura4-D18</i> + pSM26 Pmid1 GFP-Nter integrated at <i>leu1<sup>+</sup></i>                                                                | This study |
| JW3624 | <i>mid1Δ::ura4<sup>+</sup> gef2-13Myc-hphMX6 ade6 leu1-32 ura4-D18</i> + pAP144 Pmid1 Cter-GFP integrated at <i>leu1<sup>+</sup></i>                                                               | This study |
| JW3628 | <i>mid1Δ::ura4<sup>+</sup> rlc1-tdTomato-natMX6 ade6 leu1-32 ura4-D18</i> + pSM26 Pmid1 GFP-Nter integrated at <i>leu1<sup>+</sup></i>                                                             | This study |
| JW3629 | <i>mid1Δ::ura4<sup>+</sup> gef2Δ::hphMX6 rlc1-tdTomato-natMX6 ade6 leu1-32 ura4-D18</i> + pSM26 Pmid1 GFP-Nter integrated at <i>leu1<sup>+</sup></i>                                               | This study |
| JW3647 | <i>cdr2Δ::kanMX6 mid1Δ::ura4<sup>+</sup> ade6 leu1-32 ura4-D18</i> + pSM26 Pmid1 GFP-Nter integrated at <i>leu1<sup>+</sup></i>                                                                    | This study |
| JW3670 | <i>gef2Δ::hphMX6 mid1(1-580)-6His-mECitrine-kanMX6 ade6 leu1-32 ura4-D18</i>                                                                                                                       | This study |
| JW3705 | <i>plo1.ts18::ura4<sup>+</sup> mid1Δ::kanMX4 ade6 leu1-32 ura4-D18</i> + pMA23 [pJK148-Pmid1-mid1(Δ300-350)-4GFP-stopnmt] integrated at <i>leu1<sup>+</sup></i>                                    | This study |
| JW3721 | <i>gef2Δ::kanMX4 mid1Δ::ura4<sup>+</sup> ade6 leu1-32 ura4-D18</i> + pAP163 Pmid1 Helix* NLS* mid1-GFP integrated at <i>leu1<sup>+</sup></i>                                                       | This study |
| JW3722 | <i>plo1-24C ade6 leu1-32 ura4-D18</i>                                                                                                                                                              | This study |
| JW3723 | <i>plo1-1 ade6 leu1-32 ura4-D18</i>                                                                                                                                                                | This study |
| JW3724 | <i>plo1-25 ade6 leu1-32 ura4-D18</i>                                                                                                                                                               | This study |
| JW3825 | <i>h<sup>-</sup> kanMX6-Pgef2-mECitrine-4Gly-gef2 ade6-M216 leu1-32 ura4-D18</i>                                                                                                                   | This study |
| JW3826 | <i>h<sup>-</sup> kanMX6-Pgef2-mECitrine-4Gly-gef2(Δ1-956) ade6-M216 leu1-32 ura4-D18</i>                                                                                                           | This study |
| JW3827 | <i>h<sup>-</sup> kanMX6-Pgef2-mECitrine-gef2(Δ1-443) ade6-M216 leu1-32 ura4-D18</i>                                                                                                                | This study |
| JW3828 | <i>h<sup>-</sup> kanMX6-Pgef2-mECitrine-gef2(Δ1-600) ade6-M216 leu1-32 ura4-D18</i>                                                                                                                | This study |
| JW3829 | <i>mid1-ΔF::ura4<sup>+</sup> gef2-mECitrine-natMX6 ade6 leu1-32 ura4-D18</i> + pMA23 [pJK148-Pmid1-mid1(Δ300-350)-13Myc-hphMX6] integrated at <i>leu1</i> locus (but not <i>leu1<sup>+</sup></i> ) | This study |
| JW3830 | <i>mid1-ΔF::ura4<sup>+</sup> gef2-mECitrine-natMX6 ade6 leu1-32 ura4-D18</i> + pMA21 [pJK148-Pmid1-mid1(Δ400-450)-13Myc-hphMX6] integrated at <i>leu1</i> locus (but not <i>leu1<sup>+</sup></i> ) | This study |
| JW3843 | <i>plo1.ts18::ura4<sup>+</sup> kanMX6-Pgef2-mECitrine-4Gly-gef2 ade6 leu1-32 ura4-D18</i>                                                                                                          | This study |
| JW3846 | <i>cdr2Δ::kanMX6 kanMX6-Pgef2- mECitrine-4Gly-gef2 Patb2-CFP-atb2 ade6 leu1-32 ura4-D18</i>                                                                                                        | This study |

|        |                                                                                                                              |            |
|--------|------------------------------------------------------------------------------------------------------------------------------|------------|
| JW3848 | <i>blt1Δ::kanMX4 kanMX6-Pgef2-mECitrine-4Gly-gef2 Patb2-CFP-atb2 ade6 leu1-32 ura4-D18</i>                                   | This study |
| JW3852 | <i>kanMX6-Pgef2-mECitrine-4Gly-gef2 Patb2-CFP-atb2 ade6 leu1-32 ura4-D18</i>                                                 | This study |
| JW3853 | <i>kanMX6-Pgef2-mECitrine-4Gly-gef2 kan<sup>s</sup>-Pmyo2-mCFP-myo2 Patb2-CFP-atb2 ade6 leu1-32 ura4-D18</i>                 | This study |
| JW3856 | <i>plo1.ts18::ura4<sup>+</sup> kanMX6-Pgef2-mECitrine-4Gly-gef2(Δ1-956) ade6 leu1-32 ura4-D18</i>                            | This study |
| JW3857 | <i>plo1.ts18::ura4<sup>+</sup> kanMX6-Pgef2-mECitrine-gef2(Δ1-443) ade6 leu1-32 ura4-D18</i>                                 | This study |
| JW3858 | <i>plo1.ts18::ura4<sup>+</sup> kanMX6-Pgef2-mECitrine -gef2(Δ1-600) ade6 leu1-32 ura4-D18</i>                                | This study |
| JW3949 | <i>gef2Δ::hphMX6 mid1-366 ade6 leu1-32 ura4-D18</i>                                                                          | This study |
| JW3950 | <i>gef2Δ::hphMX6 kanMX6-P81nmt1-mECitrine-mid1 ade6 leu1-32 ura4-D18</i>                                                     | This study |
| JW3972 | <i>h<sup>-</sup> gef2Δ::hphMX6 ade6 leu1-32 ura4-D18</i>                                                                     | This study |
| JW4226 | <i>h<sup>+</sup> kanMX6-Pgef2-tdTomato-4Gly-gef2 ade6 leu1-32 ura4-D18</i>                                                   | This study |
| JW4231 | <i>rlc1-tdTomato-natMX6 mid1-mEGFP-kanMX6 ade6 leu1-32 ura4-D18</i>                                                          | This study |
| JW4232 | <i>gef2Δ::hphMX6 rlc1-tdTomato-natMX6 mid1-mEGFP-kanMX6 ade6 leu1-32 ura4-D18</i>                                            | This study |
| JW4233 | <i>plo1.ts18::ura4<sup>+</sup> rlc1-tdTomato-natMX6 mid1-mEGFP-kanMX6 ade6 leu1-32 ura4-D18</i>                              | This study |
| JW4234 | <i>gef2Δ::hphMX6 plo1.ts18::ura4<sup>+</sup> rlc1-tdTomato-natMX6 mid1-mEGFP-kanMX6 ade6 leu1-32 ura4-D18</i>                | This study |
| JW4235 | <i>kanMX6-Pgef2-tdTomato-4Gly-gef2 plo1-3GFP-kanMX6 ade6 leu1-32 ura4-D18</i>                                                | This study |
| JW4236 | <i>kanMX6-Pgef2-tdTomato-4Gly-gef2 mid1-mEGFP-kanMX6 ade6 leu1-32 ura4-D18</i>                                               | This study |
| JW4237 | <i>blt1Δ::kanMX4 kanMX6-Pgef2-mEGFP-4Gly-gef2 sad1-tdTomato-natMX6 ade6 leu1-32 ura4-D18</i>                                 | This study |
| JW4238 | <i>h<sup>-</sup> gef2(Δ211-443)-Tgef2-kanMX6 ade6-M216 leu1-32 ura4-D18</i>                                                  | This study |
| JW4241 | <i>plo1.ts18::ura4<sup>+</sup> gef2(Δ211-443)-Tgef2-kanMX6 ade6 leu1-32 ura4-D18</i>                                         | This study |
| JW4307 | <i>h<sup>+</sup> kanMX6-Pgef2-mECitrine-4Gly-gef2(Δ211-1101)-T<sub>ADHI</sub>-natMX6 ade6 leu1-32 ura4-D18</i>               | This study |
| JW4308 | <i>h<sup>+</sup> kanMX6-Pgef2-mECitrine-4Gly-gef2(Δ444-1101)-T<sub>ADHI</sub>-natMX6 ade6 leu1-32 ura4-D18</i>               | This study |
| JW4309 | <i>h<sup>+</sup> kanMX6-Pgef2-mECitrine-4Gly-gef2(Δ601-1101)-T<sub>ADHI</sub>-natMX6 ade6 leu1-32 ura4-D18</i>               | This study |
| JW4310 | <i>h<sup>+</sup> kanMX6-Pgef2-mECitrine-4Gly-gef2(Δ957-1101)-T<sub>ADHI</sub>-hphMX6 ade6 leu1-32 ura4-D18</i>               | This study |
| JW4312 | <i>plo1.ts18::ura4<sup>+</sup> kanMX6-Pgef2-mECitrine-4Gly-gef2(Δ211-1101)-T<sub>ADHI</sub>-natMX6 ade6 leu1-32 ura4-D18</i> | This study |
| JW4313 | <i>plo1.ts18::ura4<sup>+</sup> kanMX6-Pgef2-mECitrine-4Gly-gef2(Δ444-1101)-T<sub>ADHI</sub>-natMX6 ade6 leu1-32 ura4-D18</i> | This study |
| JW4314 | <i>plo1.ts18::ura4<sup>+</sup> kanMX6-Pgef2-mECitrine-4Gly-gef2(Δ601-</i>                                                    | This study |

|         |                                                                                                                                                                                      |                                     |
|---------|--------------------------------------------------------------------------------------------------------------------------------------------------------------------------------------|-------------------------------------|
| JW4315  | <i>1101)-T<sub>ADHI</sub>-natMX6 ade6 leu1-32 ura4-D18<br/>plo1.ts18::ura4<sup>+</sup> kanMX6-Pgef2-mECitrine-4Gly-gef2(Δ957-1101)-T<sub>ADHI</sub>-hphMX6 ade6 leu1-32 ura4-D18</i> | This study                          |
| JW4317  | <i>plo1.ts18::ura4<sup>+</sup> mid1-13Myc-kanMX6 ade6 leu1-32 ura4-D18</i>                                                                                                           | This study                          |
| JW4318  | <i>gef2Δ::hphMX6 plo1.ts18::ura4<sup>+</sup> mid1-13Myc-kanMX6 ade6 leu1-32 ura4-D18</i>                                                                                             | This study                          |
| AP583   | <i>h<sup>-</sup> mid1Δ::ura4<sup>+</sup> ade6-M216 leu1-32 ura4-D18 + pAP159 Pmid1 Helix* mid1-GFP integrated at leu1<sup>+</sup></i>                                                | Celton-Morizur <i>et al.</i> , 2004 |
| AP621   | <i>h<sup>-</sup> mid1Δ::ura4<sup>+</sup> ade6-M216 leu1-32 ura4-D18 + pAP144 Pmid1 Cter-GFP integrated at leu1<sup>+</sup></i>                                                       | Celton-Morizur <i>et al.</i> , 2004 |
| AP630   | <i>h<sup>-</sup> mid1Δ::ura4<sup>+</sup> ade6-M216 leu1-32 ura4-D18 + pAP163 Pmid1 Helix* NLS* mid1-GFP integrated at leu1<sup>+</sup></i>                                           | Celton-Morizur <i>et al.</i> , 2004 |
| AP734   | <i>h<sup>-</sup> mid1Δ::ura4<sup>+</sup> ade6-M216 leu1-32 ura4-D18 + pAP167 Pmid1 NLS* mid1-GFP integrated at leu1<sup>+</sup></i>                                                  | Celton-Morizur <i>et al.</i> , 2004 |
| AP998   | <i>h<sup>-</sup> mid1Δ::ura4<sup>+</sup> ade6-M216 leu1-32 ura4-D18 + pSM26 Pmid1 GFP-Nter integrated at leu1<sup>+</sup></i>                                                        | Celton-Morizur <i>et al.</i> , 2004 |
| AP1943  | <i>h<sup>-</sup> mid1Δ::kanMX4 ade6-M216 leu1-32 ura4-D18 + pMA21 [pJK148-Pmid1-mid1(Δ400-450)-4GFP-stopnmt] integrated at leu1<sup>+</sup></i>                                      | Almonacid <i>et al.</i> , 2009      |
| AP1977  | <i>h<sup>-</sup> mid1Δ::kanMX4 ade6-M216 leu1-32 ura4-D18 + pMA23 [pJK148-Pmid1-mid1(Δ300-350)-4GFP-stopnmt] integrated at leu1<sup>+</sup></i>                                      | Almonacid <i>et al.</i> , 2009      |
| FC164   | <i>h<sup>-</sup> mid1-366</i>                                                                                                                                                        | Chang <i>et al.</i> , 1996          |
| FY12587 | <i>h<sup>-</sup> ade6-M210 ura4 leu1<sup>+</sup>::GFP-psy1</i>                                                                                                                       | Nakamura <i>et al.</i> , 2001       |
| IH1600  | <i>h<sup>+</sup> plo1.ts18::ura4<sup>+</sup> ade6-M210 his2 leu1-32 ura4-D18</i>                                                                                                     | MacIver <i>et al.</i> , 2003        |
| IH1752  | <i>h<sup>-</sup> plo1.ts4::ura4<sup>+</sup> ade6-M210 leu1-32 ura4-D18</i>                                                                                                           | Tanaka <i>et al.</i> , 2001         |
| JB201   | <i>h<sup>+</sup> plo1-25 ura4-D18</i>                                                                                                                                                | Bähler <i>et al.</i> , 1998a        |
| JM346   | <i>h<sup>+</sup> cdr2-mEGFP-kanMX6 ade6 leu1-32 ura4-D18</i>                                                                                                                         | Moseley <i>et al.</i> , 2009        |
| JM578   | <i>h<sup>+</sup> cdr2Δ::kanMX6 ade6 leu1-32 ura4-D18</i>                                                                                                                             | Moseley <i>et al.</i> , 2009        |
| TP47    | <i>h<sup>-</sup> cdc11-136 his7-366 leu1-32 ura4-D18</i>                                                                                                                             | Bezanilla <i>et al.</i> , 1997      |
| YDM110  | <i>h<sup>+</sup> plo1-1 leu1-32 ura4-D18</i>                                                                                                                                         | Bähler <i>et al.</i> , 1998a        |
| YDM114  | <i>h<sup>+</sup> plo1-24C ade6-M210 leu1-32 ura4-D18</i>                                                                                                                             | Bähler <i>et al.</i> , 1998a        |
| YDM429  | <i>h<sup>+</sup> sid2-250 ade6-M210 leu1-32 ura4-D18</i>                                                                                                                             | Sparks <i>et al.</i> , 1999         |

Supplemental Figure 1, Ye et al.

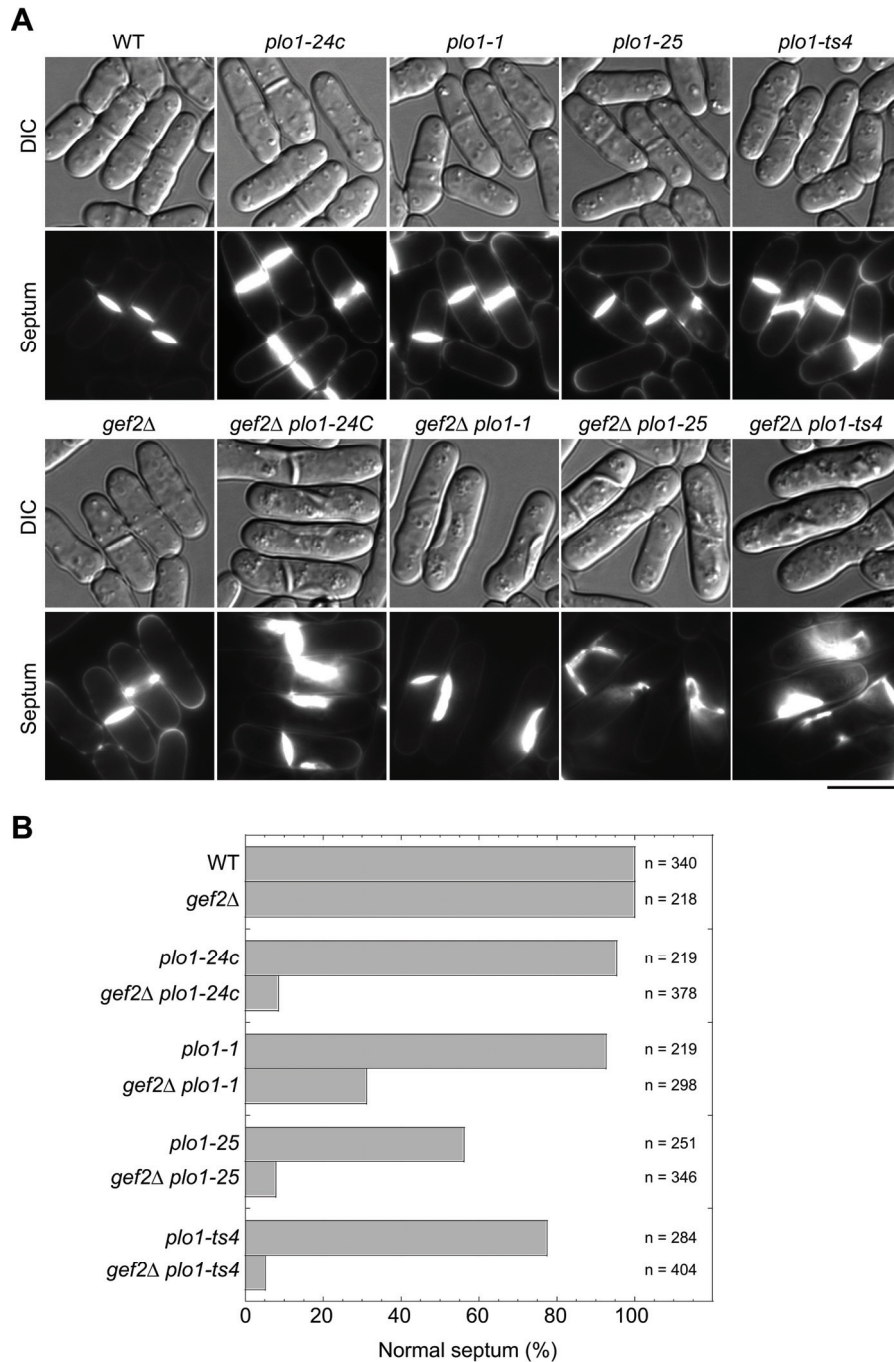

**SUPPLEMENTAL FIGURE S1: Gef2 is required for division-site positioning when Polo kinase Plo1 function is compromised. (A and B) Phenotype and quantification of *gef2Δ plo1* mutants in septum positioning. 24 h after grown in YE5S medium at 25°C, cells (JW2556, JW3184, JW3722, JW3550, JW3723, JW3551, JW3724, JW3552, IH1752, and JW3553) were shifted to 32°C for 5 h before staining and imaging. (A) DIC and Calcofluor staining of septa. (B) Quantification of % normal septum observed in**

Calcofluor-stained cells. In this and other figures, we defined a septum formed within the central 20% of the cell as a normal septum. Bars, 10  $\mu\text{m}$ .

Supplemental Figure 2, Ye et al.

**A**

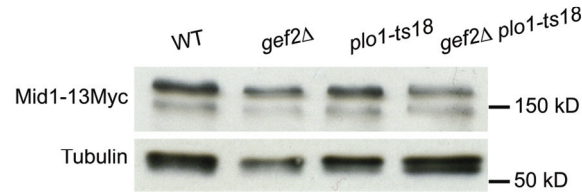

**B**

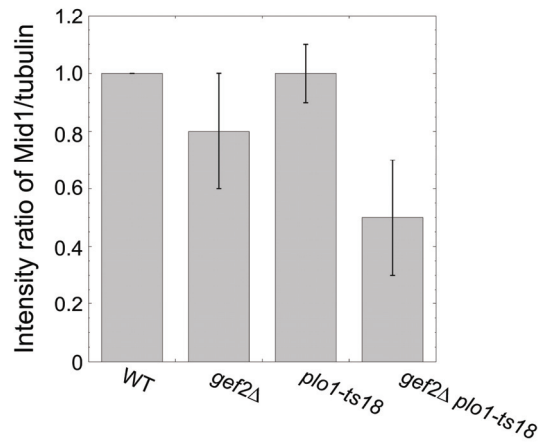

**SUPPLEMENTAL FIGURE S2:** Mid1 protein level revealed by western blotting. (A and B) Western blotting and quantification of Mid1-13Myc total protein level in cells. Cells (JW3276, JW3277, JW4317, and JW4318) were grown in YE5S at 25°C. (A) Western blotting of total extracted proteins using anti-Myc and anti-tubulin TAT1 antibodies (Woods *et al.*, 1989). (B) Quantification of Mid1 level. The intensity ratio (mean  $\pm$  SD; n = 3) of Mid1/tubulin in each mutant relative to that in wt, which was set as 1.0, is shown.



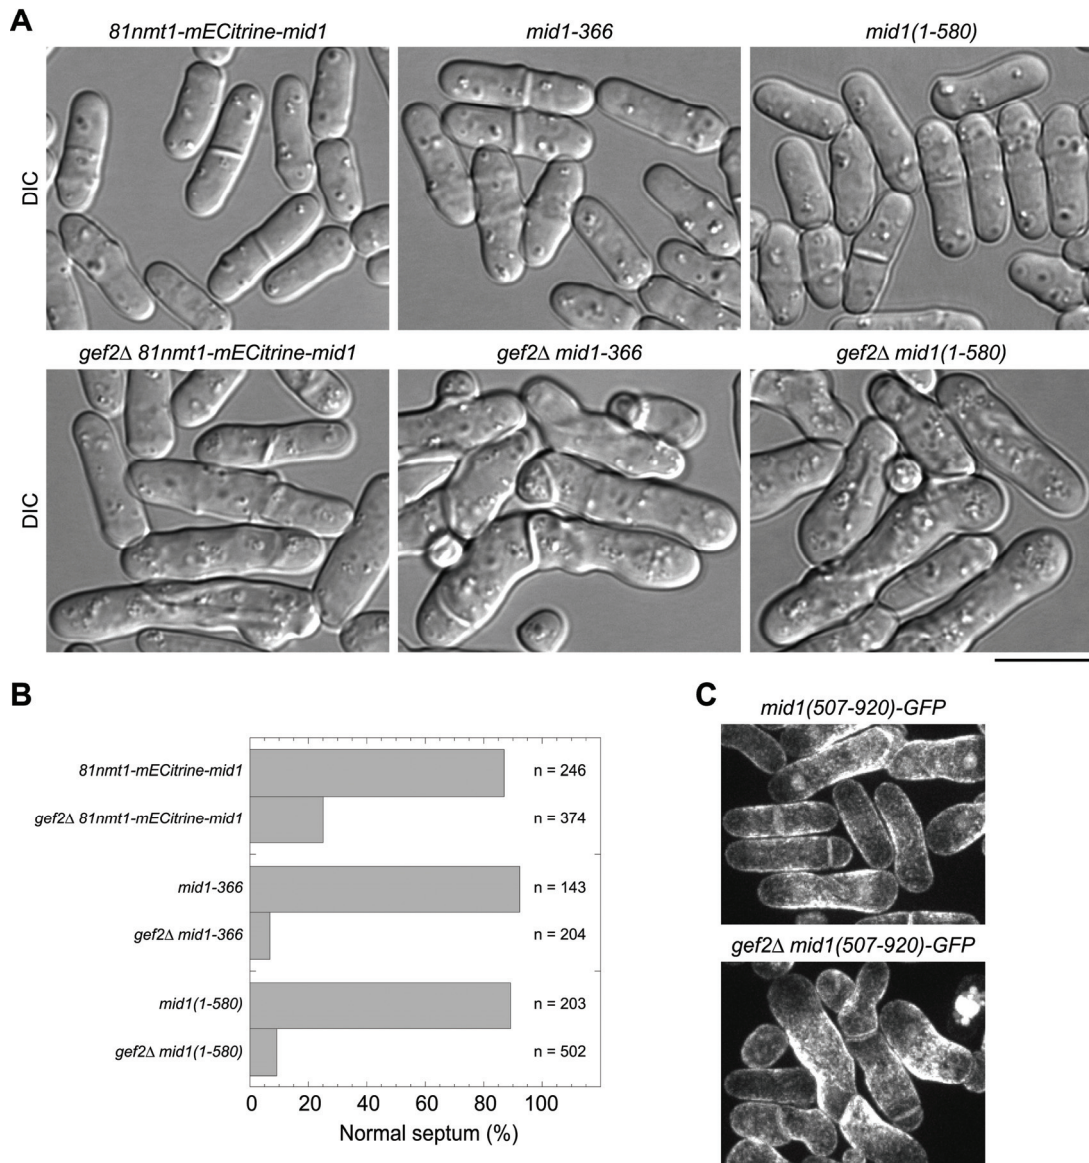

**SUPPLEMENTAL FIGURE S3:** Gef2 is required for division-site positioning when Mid1 is depleted or Mid1 function is compromised. (A and B) Phenotype and quantification of *gef2Δ mid1* mutants in septum positioning. Cells (JW3364, JW3950, JW2255, JW3949, JW2603, and JW3670) were grown in YE5S at 25°C for 20 h before staining and imaging. (A) DIC image. (B) Quantification of % normal septum observed in Calcofluor-stained cells. (C) Gef2 is dispensable for the localization of Mid1(507-920) to the plasma membrane. AP621 and JW3569 cells were grown at 25°C. Bars, 10 μm.
